# Supplementary material
Source: MDPI journal article supplement (https://www.mdpi.com/2218-6581/6/3/16)
Supplement: s1 [file s1]

### 3 Supplementary: Supporting videos from the experiments

|              |                                                                                                                                                                                  |
|--------------|----------------------------------------------------------------------------------------------------------------------------------------------------------------------------------|
| Title:       | Encoding and decoding in PLBM                                                                                                                                                    |
| Description: | This video illustrates effects of encoding, which clusters similar motion closer to one another. It also shows the generated motion, which is comparable to the original motion. |
| Video URL:   | <a href="https://youtu.be/yUII3-31sc0">https://youtu.be/yUII3-31sc0</a>                                                                                                          |

|              |                                                                                                                                                                                                                                                                      |
|--------------|----------------------------------------------------------------------------------------------------------------------------------------------------------------------------------------------------------------------------------------------------------------------|
| Title:       | Generating congruent and expressive gesture using PLBM during decouple                                                                                                                                                                                               |
| Description: | This video shows the associating process of the PLBM. During learning, the PLBM learns and creates rules across all the modalities, e.g. facial features and gesture. In a decoupling situation, the PLBM can insert congruent gestures given observable modalities. |
| Video URL:   | <a href="https://youtu.be/VRKo_r303h0">https://youtu.be/VRKo_r303h0</a>                                                                                                                                                                                              |

|              |                                                                                                                                                                                                                    |
|--------------|--------------------------------------------------------------------------------------------------------------------------------------------------------------------------------------------------------------------|
| Title:       | Generating smooth and expressive gesture using PLBM during intermittent connection                                                                                                                                 |
| Description: | This video illustrates the disadvantages of transmitting spatial features during teleoperation. Furthermore, it also demonstrates the advantage of using spatiotemporal distributed features during teleoperation. |
| Video URL:   | <a href="https://youtu.be/qB3Xx80oEXs">https://youtu.be/qB3Xx80oEXs</a>                                                                                                                                            |

|              |                                                                                                                                                                                           |
|--------------|-------------------------------------------------------------------------------------------------------------------------------------------------------------------------------------------|
| Title:       | Collision avoidance using PLBM with EA                                                                                                                                                    |
| Description: | This video shows the result of the PLBM tuning the motion to avoid a collision. It also displays the evolutionary algorithm procedure to find the best solution in a collision situation. |
| Video URL:   | <a href="https://youtu.be/HLtWGTYhRUA">https://youtu.be/HLtWGTYhRUA</a>                                                                                                                   |
